# Supplementary material for: Genomic epidemiology of carbapenem-resistant Enterobacterales at a New York City hospital over a 10-year period reveals complex plasmid-clone dynamics and evidence for frequent horizontal transfer of blaKPC
Source: Genome Res. 2024 Nov;34(11):1895–907. doi: 10.1101/gr.279355.124 (PMC11610580; doi:10.1101/gr.279355.124)
Supplement: Supplement 3 [file Supplemental_Table_S2.xlsx]

## Sheet: Sheet1
Supplemental Table S2. blaKPC-harboring plasmids isolated from fecal samples from liver transplant recipients. 11 plasmids from 10 patients with available fecal samples collected between 2014-2018 were included in a clustering analysis with CRE plasmids from clinical isolates.
Isolate ID	Plasmid ID	Culture Year	Bacterial species	Genome assembly accession number	Plasmid assembly length (bp)	%GC content	blaKPC type	Tn4401 Isoform	Plasmid blaKPC rep gene type(s)	Plasmid blaKPC rep gene accession number(s)	Plasmid secondary MOB-Cluster
35011	35011_6	2014	Klebsiella pneumoniae	JBGFFY000000000	141279	0.54	KPC-3	Tn4401d	IncFIA/FII	AF250878, KF954760	AA057
35088A	35088A_5	2014	Klebsiella pneumoniae	JBGFFZ000000000	69416	0.554	KPC-2	Tn4401a	IncR	000204__CP008701_00115	AA073
35088A	35088A_6	2014	Klebsiella pneumoniae	JBGFFZ000000000	203792	0.53	KPC-2	Tn4401e	IncC	000092__CP025470	AA029
35132A	35132A_7	2014	Klebsiella pneumoniae	JBGFGA000000000	229506	0.531	KPC-2	Tn4401a	IncFIB/FII	000107__CP014778_00094, 000132__HG969996, CP017721_00179	AA050
35161A	35161A_3	2014	Klebsiella pneumoniae	JBGFGB000000000	32294	0.474	KPC-3	Tn4401d	IncX4	000224__NC_022105_00002	N/A
35177A	35177A_22	2014	Enterobacter asburiae	JBGFGC000000000	60186	0.531	KPC-3	Tn4401b	IncN	000153__NC_019087_00001	AA030
35242	35242_4	2015	Klebsiella pneumoniae	JBGFGD000000000	203837	0.53	KPC-2	Tn4401e	IncC	000092__CP025470	AA029
35340A	35340A_13	2015	Escherichia coli	JBGFGE000000000	129486	0.534	KPC-3	Tn4401a	IncFIB	000097__NC_025166_00051	AA068
35902A	35902A_4	2017	Klebsiella quasipneumoniae	JBGFGF000000000	57108	0.525	KPC-3	Tn4401b	IncN	000153__NC_019087_00001	AA030
35911A	35911A_10	2017	Klebsiella michiganensis	JBGFGG000000000	62767	0.535	KPC-3	Tn4401b	IncN	000153__NC_019087_00001	AA030
35940A	35940A_6	2018	Citrobacter freundii	JBGFGH000000000	16337	0.564	KPC-3	Tn4401b	ColRNAI	CP041116_00002	AA042
